# Supplementary material for: Development of an HPLC-MS/MS Method for the Determination of Alkaloids in Lupins
Source: MDPI journal article supplement (doi:10.3390/molecules28041531), 2023-02-05
Supplement: s1 [file s1]

## Supplementary material

### Development of HPLC-MS/MS method for the determination of alkaloids profile in lupins

Fabiola Eugelio <sup>1</sup>, Sara Palmieri <sup>1</sup>, Federico Fanti<sup>1,\*</sup>, Luana Messuri<sup>1</sup>, Alessia Pepe<sup>1</sup>, Dario Compagnone <sup>1</sup>, and Manuel Sergi <sup>2</sup>

<sup>1</sup>Department of Bioscience and Technology for Food, Agriculture and Environment, University of Teramo, Via Renato Balzarini 1, 64100 Teramo, Italy

<sup>2</sup>Department of Chemistry, Sapienza University of Rome, Piazzale Aldo Moro 5, 00185 Rome, Italy

\*Correspondence: ffanti@unite.it

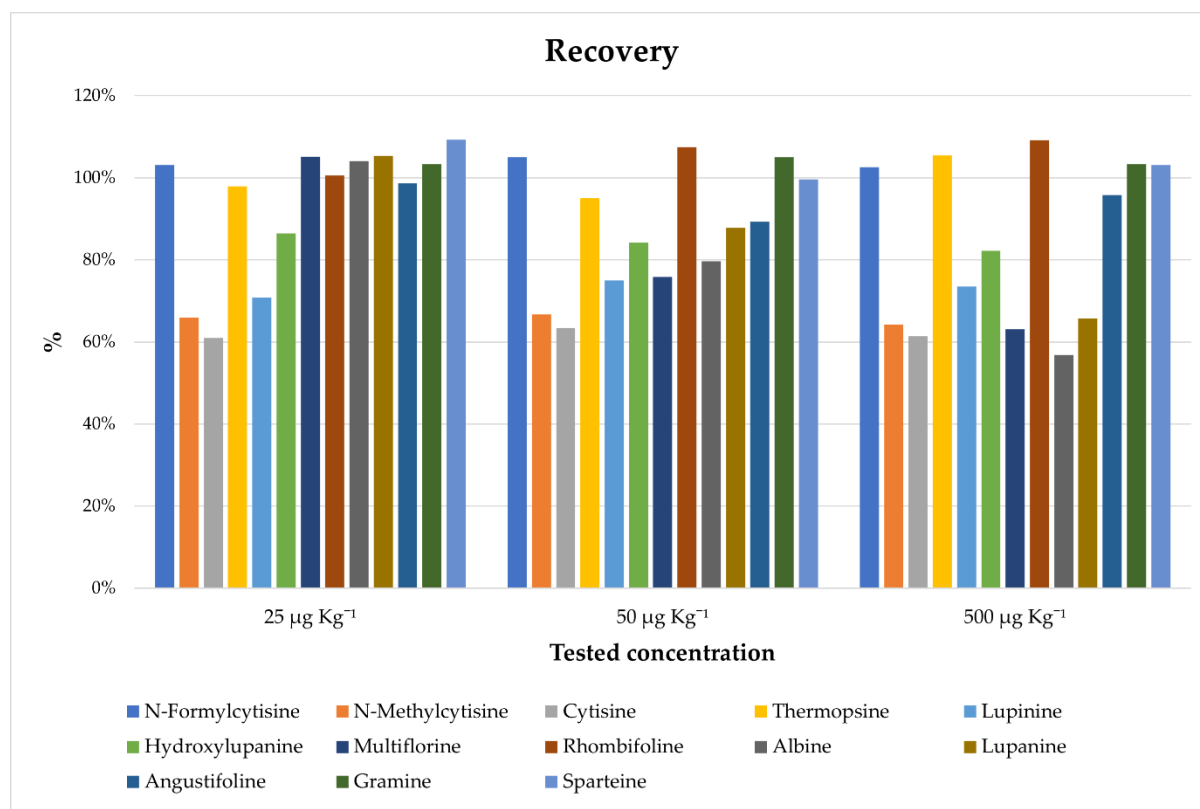

**Figure S1.** Results of recovery evaluation obtained from validation tests are shown.

**Table S1.** LAs identified and quantified in *L. albus* L. raw seeds, characterized by different size and different agronomical treatments. Data are reported in mg Kg<sup>-1</sup>.

| Analytes        | Raw seeds 11/13 mm<br>(mg Kg <sup>-1</sup> ) | Raw seeds 13/15 mm<br>(mg Kg <sup>-1</sup> ) | Raw seeds 15/17 mm<br>(mg Kg <sup>-1</sup> ) | Raw seeds 15/17 mm<br>Bio (mg Kg <sup>-1</sup> ) |
|-----------------|----------------------------------------------|----------------------------------------------|----------------------------------------------|--------------------------------------------------|
| Lupanine        | 25400.85±201.81                              | 19685.45±967.61                              | 18007.35±946.53                              | 31025.80±1703.07                                 |
| Multiflorine    | 1276.42±367.12                               | 1524.96±96.34                                | 1176.75±62.15                                | 2367.27±388.33                                   |
| Albine          | 691.8±55.34                                  | 502.08±52.22                                 | 386.73±31.64                                 | 818.50±30.41                                     |
| Hydroxylupanine | 594.43±562.96                                | 220.25±67.67                                 | 126.10±31.40                                 | 443.18±0.81                                      |
| Angustifoline   | 288.93±40.57                                 | 192.15±3.55                                  | 190.52±13.15                                 | 306.98±13.39                                     |
| Sparteine       | 164.15±30.41                                 | 60.96±18.17                                  | 71.03±17.15                                  | 68.98±29.02                                      |
| Total content   | 28416.56±1258.22                             | 22185.83±1205.55                             | 19958.47±1102.02                             | 35030.70±2165.04                                 |

**Table S2.** Chemical properties and supplier information of the target standard alkaloids.

|                   | N-Formylcytisine                                                                   | Cytisine                                                                           | (+)-Hydroxylupanine                                                                | N-Methylcytisine                                                                   | (-)-Lupanine                                                                        | Albine                                                                               | (-)-Angustifoline                                                                    |
|-------------------|------------------------------------------------------------------------------------|------------------------------------------------------------------------------------|------------------------------------------------------------------------------------|------------------------------------------------------------------------------------|-------------------------------------------------------------------------------------|--------------------------------------------------------------------------------------|--------------------------------------------------------------------------------------|
|                   | 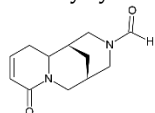 |  |  |  |  |  |  |
| Nominal mass (Da) | 218.25                                                                             | 190.24                                                                             | 264.36                                                                             | 204.27                                                                             | 169.26                                                                              | 232.32                                                                               | 234.34                                                                               |
| Molecular formula | C <sub>12</sub> H <sub>14</sub> N <sub>2</sub> O <sub>2</sub>                      | C <sub>11</sub> H <sub>14</sub> N <sub>2</sub> O                                   | C <sub>15</sub> H <sub>24</sub> N <sub>2</sub> O <sub>2</sub>                      | C <sub>12</sub> H <sub>16</sub> N <sub>2</sub> O                                   | C <sub>10</sub> H <sub>19</sub> NO                                                  | C <sub>14</sub> H <sub>20</sub> N <sub>2</sub> O                                     | C <sub>14</sub> H <sub>22</sub> N <sub>2</sub> O                                     |
| CAS               | 53007-06-0                                                                         | 485-35-8                                                                           | 15358-48-2                                                                         | 486-86-2                                                                           | 486-70-4                                                                            | 53915-26-7                                                                           | 550-43-6                                                                             |
| logP              | 0.1                                                                                | 0.2                                                                                | 0.6                                                                                | 0.7                                                                                | 1.2                                                                                 | 1.3                                                                                  | 1.4                                                                                  |
| Supplier          | LGC Standards Srl                                                                  | Merck Life Science Srl                                                             | Vinci-Biochem Srl                                                                  | LGC Standards Srl                                                                  | Merck Life Science Srl                                                              | Phytoplan                                                                            | Phytoplan                                                                            |
| Purity            | 98%                                                                                | ≥99%                                                                               | ≥98%                                                                               | 97%                                                                                | ≥98%                                                                                | >95%                                                                                 | >95%                                                                                 |

|                   | Multiflorine                                                                        | Thermopsine                                                                         | (+)-Lupanine                                                                        | Rhombifoline                                                                         | Gramine                                                                               | (+)-Sparteine                                                                         |
|-------------------|-------------------------------------------------------------------------------------|-------------------------------------------------------------------------------------|-------------------------------------------------------------------------------------|--------------------------------------------------------------------------------------|---------------------------------------------------------------------------------------|---------------------------------------------------------------------------------------|
|                   |  |  |  |  |  |  |
| Nominal mass (Da) | 246.35                                                                              | 244.33                                                                              | 248.36                                                                              | 244.33                                                                               | 174.24                                                                                | 234.38                                                                                |
| Molecular formula | C <sub>15</sub> H <sub>22</sub> N <sub>2</sub> O                                    | C <sub>15</sub> H <sub>20</sub> N <sub>2</sub> O                                    | C <sub>15</sub> H <sub>24</sub> N <sub>2</sub> O                                    | C <sub>15</sub> H <sub>20</sub> N <sub>2</sub> O                                     | C <sub>11</sub> H <sub>14</sub> N <sub>2</sub>                                        | C <sub>15</sub> H <sub>26</sub> N <sub>2</sub>                                        |
| CAS               | 529-80-6                                                                            | 486-89-5                                                                            | 550-90-3                                                                            | 529-78-2                                                                             | 87-52-5                                                                               | 492-08-0                                                                              |
| logP              | 1.5                                                                                 | 1.6                                                                                 | 1.6                                                                                 | 1.8                                                                                  | 1.8                                                                                   | 2.5                                                                                   |
| Supplier          | Phytoplan                                                                           | Vinci-Biochem Srl                                                                   | Vinci-Biochem Srl                                                                   | Clinisciences                                                                        | Merck Life Science Srl                                                                | Merck Life Science Srl                                                                |
| Purity            | >95%                                                                                | ≥98%                                                                                | ≥95%                                                                                | ≥98%                                                                                 | ≥99%                                                                                  | ≥98%                                                                                  |

**Table S3.** MS/MS parameters of the selected analytes for the MRM acquisition; m/z value of precursor compounds in first quadrupole (Q<sub>1</sub>) is reported as [M+H]<sup>+</sup>; also, m/z values of the ion fragments in the third quadrupole (Q<sub>3</sub>) are reported.

| Analytes             | R <sub>t</sub> (min) | Q <sub>1</sub> (Da) | DP (V) | EP (V) | Q <sub>3</sub> (Da) | CE (V) | CXP (V) |
|----------------------|----------------------|---------------------|--------|--------|---------------------|--------|---------|
| N-Formylcytisine     | 2.38                 | 218.9               | 110    | 9      | 148.0               | 33     | 11      |
|                      |                      |                     |        |        | 160.1               | 34     | 10      |
| N-Methylcytisine     | 2.88                 | 204.9               | 90     | 7      | 146.1               | 29     | 5       |
|                      |                      |                     |        |        | 107.9               | 28     | 7       |
| Cytisine             | 2.90                 | 190.8               | 95     | 10     | 148.1               | 28     | 5       |
|                      |                      |                     |        |        | 133.0               | 45     | 10      |
| Thermopsine          | 3.17                 | 245.1               | 98     | 11     | 98.1                | 38     | 10      |
|                      |                      |                     |        |        | 70.1                | 66     | 7       |
| (-)-Lupinine         | 3.23                 | 170.0               | 95     | 11     | 152.0               | 32     | 10      |
|                      |                      |                     |        |        | 124.0               | 38     | 10      |
| (+) -Hydroxylupanine | 3.25                 | 265.0               | 122    | 10     | 247.2               | 36     | 10      |
|                      |                      |                     |        |        | 148.1               | 50     | 10      |
| Multiflorine         | 3.34                 | 247.1               | 16     | 10     | 112.2               | 35     | 4       |
|                      |                      |                     |        |        | 70.1                | 56     | 5       |
| Rhombifoline         | 3.50                 | 245.1               | 90     | 10     | 98.2                | 31     | 8       |
|                      |                      |                     |        |        | 203.1               | 25     | 8       |
| Albine               | 3.51                 | 233.0               | 24     | 11     | 112.1               | 29     | 6       |
|                      |                      |                     |        |        | 138.0               | 25     | 9       |
| (+) -Lupanine        | 3.52                 | 248.9               | 45     | 11     | 136.1               | 41     | 4       |
|                      |                      |                     |        |        | 114.0               | 38     | 8       |
| Angustifoline        | 3.73                 | 235.1               | 46     | 12     | 193.0               | 27     | 6       |
|                      |                      |                     |        |        | 112.1               | 37     | 6       |
| Gramine              | 4.22                 | 175.1               | 38     | 10     | 130.0               | 18     | 4       |
|                      |                      |                     |        |        | 46.1                | 16     | 3       |
| (+) -Sparteine       | 4.26                 | 235.0               | 45     | 11     | 98.1                | 49     | 8       |
|                      |                      |                     |        |        | 233.1               | 38     | 8       |
